# Supplementary material for: Violent Behavior and Gender of Swedish Psychiatric Patients: A Prospective Clinical Study
Source: Atypon-hosted journal article supplement (doi:10.1176/appi.ps.201200266), 2013-07-01
Supplement: 688_ds001.pdf [file 688_ds001.pdf]

Percentage of violent patients, by predicted level of violence risk, among 331 nonforensic psychiatric patients in Sweden<sup>a</sup>

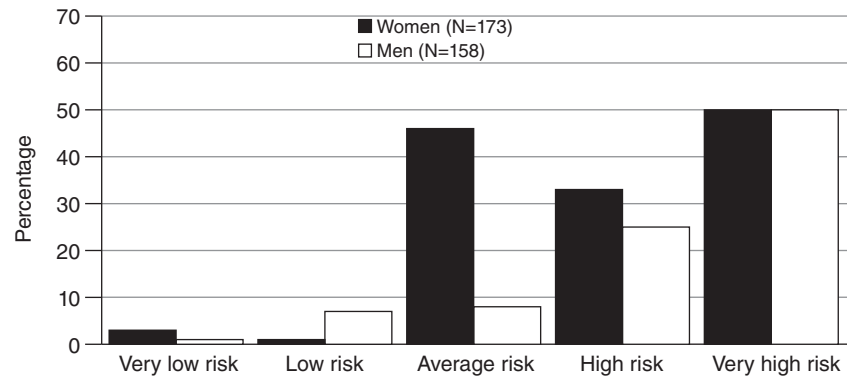

<sup>a</sup> Assessed by Classification of Violence Risk software
