# Supplementary material for: Violent Behavior and Gender of Swedish Psychiatric Patients: A Prospective Clinical Study
Source: Atypon-hosted journal article supplement (doi:10.1176/appi.ps.201200266), 2013-07-01
Supplement: 688_ds001.pdf [file 688_ds001.pdf]

 


Psychiatry Online
